# Supplementary material for: Common Data Elements for Acute Coronary Syndrome: Analysis Based on the Unified Medical Language System
Source: PubMed Central journal article supplement (PMC6729118; doi:10.2196/14107), 2019-08-23
Supplement: medinform_v7i3e14107_app1.pdf [file medinform_v7i3e14107_app1.pdf]

## SUPPLEMENT 1: LIST OF ALL CONTACTED REGISTRIES WITH RESPONSE

| Name                                                                                                                                  | Weblink                                                                                                                                                                                                                                   | Contact date<br>(dd.mm.yyyy) | Result    |
|---------------------------------------------------------------------------------------------------------------------------------------|-------------------------------------------------------------------------------------------------------------------------------------------------------------------------------------------------------------------------------------------|------------------------------|-----------|
| Acute Coronary Syndrome Quality Improvement in Kerala (ACS QUIK)                                                                      | <a href="http://www.csikerala.org/acsregistry.php">http://www.csikerala.org/acsregistry.php</a>                                                                                                                                           | 19.03.2015                   | Included  |
| Deutsches CPU-Register                                                                                                                | <a href="https://cpu.dgk.org/cpu-register/">https://cpu.dgk.org/cpu-register/</a>                                                                                                                                                         | 18.06.2015                   | Included  |
| PCI Register der ALKK                                                                                                                 | <a href="https://stiftung-ihf.de/index.php/de/projekte/projekte-2014/pci-register">https://stiftung-ihf.de/index.php/de/projekte/projekte-2014/pci-register</a>                                                                           | 18.06.2015                   | Included  |
| European Society of Cardiology (ACS snapshot survey, ESCARDIO ACS Survey II, ESCARDIO ACS Survey I, Acute coronary syndrome registry) | <a href="https://www.escardio.org/Research/Registries-&amp;-surveys/Observational-research-programme/registry-overview">https://www.escardio.org/Research/Registries-&amp;-surveys/Observational-research-programme/registry-overview</a> | 10.03.2015                   | Refused   |
| Scottish Heart Health Extended Cohort (SHHEC)                                                                                         | <a href="http://assign-score.com/about/shhec/">http://assign-score.com/about/shhec/</a>                                                                                                                                                   | 10.03.2015                   | No answer |
| PL-ACS                                                                                                                                | <a href="http://www.ncbi.nlm.nih.gov/pubmed/17853315">http://www.ncbi.nlm.nih.gov/pubmed/17853315</a>                                                                                                                                     | 19.03.2015                   | No answer |
| NCVD-ACS                                                                                                                              | <a href="http://www.acrm.org.my/ncvd/registries_acs.php">http://www.acrm.org.my/ncvd/registries_acs.php</a>                                                                                                                               | 19.03.2015                   | No answer |
| Jakarta Acute Coronary Syndrome Registry                                                                                              | <a href="https://clinicaltrials.gov/ct2/show/NCT02319473">https://clinicaltrials.gov/ct2/show/NCT02319473</a>                                                                                                                             | 19.03.2015                   | No answer |
| TRACS                                                                                                                                 | <a href="http://www.thaiheart.org/images/sub_1291456609/TRACS.pdf">http://www.thaiheart.org/images/sub_1291456609/TRACS.pdf</a>                                                                                                           | 19.03.2015                   | No answer |
| Brazilian Registry of Acute Coronary Syndrome                                                                                         | <a href="http://www.scielo.br/pdf/abc/2013nahead/en_aop_4817.pdf">http://www.scielo.br/pdf/abc/2013nahead/en_aop_4817.pdf</a>                                                                                                             | 19.03.2015                   | No answer |

|                                                   |                                                                                                                                                                                                                                       |            |           |
|---------------------------------------------------|---------------------------------------------------------------------------------------------------------------------------------------------------------------------------------------------------------------------------------------|------------|-----------|
| French Registry of ACS (FAST-MI)                  | <a href="https://clinicaltrials.gov/ct2/show/NCT00673036">https://clinicaltrials.gov/ct2/show/NCT00673036</a>                                                                                                                         | 19.03.2015 | No answer |
| PROCAM                                            | <a href="https://www.ncbi.nlm.nih.gov/pubmed/3202078">https://www.ncbi.nlm.nih.gov/pubmed/3202078</a>                                                                                                                                 | 19.03.2015 | No answer |
| China Acute Myocardial Infarction (CAMI) Registry | <a href="https://www.ncbi.nlm.nih.gov/pubmed/27179740">https://www.ncbi.nlm.nih.gov/pubmed/27179740</a>                                                                                                                               | 18.06.2015 | No answer |
| CRUSADE registry                                  | <a href="http://www.emcreg.org/">http://www.emcreg.org/</a>                                                                                                                                                                           | 10.03.2015 | No answer |
| Herzinfarktregister Rheinland-Pfalz               | <a href="https://msagd.rlp.de/de/unsere-themen/gesundheit-und-pflege/gesundheitliche-versorgung/herzinfarktregister/">https://msagd.rlp.de/de/unsere-themen/gesundheit-und-pflege/gesundheitliche-versorgung/herzinfarktregister/</a> | 18.06.2015 | No answer |
