# Supplementary material for: Common Data Elements for Acute Coronary Syndrome: Analysis Based on the Unified Medical Language System
Source: PubMed Central journal article supplement (PMC6729118; doi:10.2196/14107), 2019-08-23
Supplement: medinform_v7i3e14107_app2.pdf [file medinform_v7i3e14107_app2.pdf]

# 1 TABLE A2: LIST OF ALL ANALYSED FORMS

| Form name                                                      | Number of concepts | Annotated concepts | UMLS Coverage |
|----------------------------------------------------------------|--------------------|--------------------|---------------|
|                                                                |                    |                    |               |
| <b>ACCF/AHA ACS Key Data Elements</b>                          | 308                | 294                | 94%           |
| <b>ACCF/AHA ACS Key Data Elements - Primary cause of death</b> | 3                  | 3                  | 100%          |
| <b>CARDS</b>                                                   | 109                | 222                | 99%           |
| <b>Cardiology admission orders, physicians order sheet</b>     | 69                 | 75                 | 100%          |
|                                                                | 489                | 594                | 98%           |
|                                                                |                    |                    |               |
| <b>GRACE 2.0 ACS Risk Score</b>                                | 10                 | 10                 | 100%          |
| <b>ASSIGN Cardiovascular Risk Score Version 1.5</b>            | 11                 | 13                 | 100%          |
| <b>Reynolds Risk Score</b>                                     | 8                  | 8                  | 100%          |
| <b>QRISK2 CVD Score</b>                                        | 14                 | 14                 | 100%          |
| <b>Framingham Risk Score</b>                                   | 7                  | 9                  | 100%          |
| <b>TIMI Risk Score for STEMI</b>                               | 8                  | 8                  | 100%          |
| <b>TIMI Risk Score for UA/NSTEMI</b>                           | 7                  | 7                  | 100%          |
| <b>SCORE</b>                                                   | 5                  | 5                  | 100%          |
| <b>CRUSADE</b>                                                 | 8                  | 8                  | 100%          |
| <b>ACTION</b>                                                  | 8                  | 11                 | 100%          |
|                                                                | 86                 | 93                 | 100%          |
|                                                                |                    |                    |               |
| <b>GRACE</b>                                                   | 193                | 213                | 97%           |
| <b>ACTION Registry</b>                                         | 186                | 169                | 88%           |
| <b>STEMI-Register Münster</b>                                  | 83                 | 120                | 98%           |
| <b>Kerala ACS Registry</b>                                     | 71                 | 74                 | 94%           |
| <b>Deutsches CPU-Register</b>                                  | 157                | 190                | 96%           |
| <b>ALKK-PCI Register</b>                                       | 146                | 110                | 86%           |
| <b>SWEDEHEART</b>                                              | 229                | 202                | 100%          |
|                                                                | 1065               | 1078               | 94%           |
|                                                                |                    |                    |               |

|                                                                                                                 |     |     |      |
|-----------------------------------------------------------------------------------------------------------------|-----|-----|------|
| <b>Quality assurance Coronary Angiography and Percutaneous Intervention (PCI) - Basic (AQUA)</b>                | 32  | 29  | 97%  |
| <b>Quality assurance Coronary Angiography and Percutaneous Intervention (PCI) -Procedure (AQUA)</b>             | 15  | 8   | 80%  |
| <b>Quality assurance Coronary Angiography and Percutaneous Intervention (PCI) -PCI (AQUA)</b>                   | 19  | 7   | 58%  |
| <b>Quality assurance Coronary Angiography and Percutaneous Intervention (PCI) - Coronary Angiography (AQUA)</b> | 5   | 4   | 80%  |
| <b>Quality assurance Carotid Revascularization - Interventional/Catheter-assisted (PTA and/or Stent) (AQUA)</b> | 10  | 5   | 70%  |
| <b>AMI Specifications Manual for National Hospital Inpatient Quality Measures</b>                               | 42  | 28  | 88%  |
|                                                                                                                 | 123 | 81  | 79%  |
|                                                                                                                 |     |     |      |
| <b>Münster - Labor</b>                                                                                          | 22  | 22  | 100% |
| <b>Münster - Echokardiographie Anmeldung</b>                                                                    | 11  | 10  | 100% |
| <b>Münster - Echokardiographie Befund</b>                                                                       | 16  | 16  | 100% |
| <b>Münster - EKG Befund</b>                                                                                     | 11  | 11  | 100% |
| <b>Münster - Arztbrief</b>                                                                                      | 14  | 14  | 100% |
| <b>Münster - Angiographie Anmeldung</b>                                                                         | 44  | 51  | 98%  |
|                                                                                                                 | 118 | 124 | 100% |
|                                                                                                                 |     |     |      |
| <b>Bremen - Admission form</b>                                                                                  | 64  | 54  | 98%  |
| <b>Bremen - Herzkatheterbericht</b>                                                                             | 26  | 25  | 96%  |
| <b>Bremen - EKG</b>                                                                                             | 14  | 13  | 93%  |
| <b>Bremen - Labor</b>                                                                                           | 19  | 19  | 100% |
| <b>Bremen - Transösophageale Echokardiographie</b>                                                              | 16  | 16  | 100% |
| <b>Bremen - Transthorakale Echokardiographie</b>                                                                | 15  | 15  | 100% |
|                                                                                                                 | 154 | 142 | 98%  |
|                                                                                                                 |     |     |      |
| <b>Dresden - Arztbrief</b>                                                                                      | 14  | 14  | 100% |
| <b>Dresden - Operationsprotokoll (Herzklappen)</b>                                                              | 13  | 10  | 77%  |
| <b>Dresden - Herzkatheterbericht</b>                                                                            | 14  | 13  | 93%  |
| <b>Dresden - Echobericht</b>                                                                                    | 15  | 15  | 100% |
| <b>Dresden - Labor</b>                                                                                          | 35  | 35  | 100% |

|                                                                                                                                                                                           |     |     |      |
|-------------------------------------------------------------------------------------------------------------------------------------------------------------------------------------------|-----|-----|------|
| <b>Dresden - Admission form</b>                                                                                                                                                           | 54  | 54  | 100% |
|                                                                                                                                                                                           | 145 | 141 | 95%  |
| <b>Magdeburg - Arztbrief</b>                                                                                                                                                              | 11  | 11  | 100% |
| <b>Magdeburg - Labor</b>                                                                                                                                                                  | 29  | 29  | 100% |
| <b>Magdeburg - Anamnese</b>                                                                                                                                                               | 63  | 61  | 100% |
| <b>Magdeburg - Echoanmeldung</b>                                                                                                                                                          | 7   | 7   | 100% |
| <b>Magdeburg - EKG</b>                                                                                                                                                                    | 8   | 8   | 100% |
| <b>Magdeburg - Herzkatheterbericht</b>                                                                                                                                                    | 16  | 15  | 94%  |
|                                                                                                                                                                                           | 134 | 131 | 99%  |
| <b>PLATO</b>                                                                                                                                                                              | 514 | 489 | 93%  |
|                                                                                                                                                                                           | 514 | 489 | 93%  |
| <b>ATLAS</b>                                                                                                                                                                              | 310 | 195 | 96%  |
|                                                                                                                                                                                           | 310 | 195 | 96%  |
| <b>[Eligibility] EARLY ACS: Early Glycoprotein IIb/IIIa Inhibition in Patients With Non-ST-segment Elevation Acute Coronary Syndrome (Study P03684AM2)</b>                                | 16  | 16  | 100% |
| <b>[Eligibility] PLATO</b>                                                                                                                                                                | 7   | 7   | 100% |
| <b>[Eligibility] Effectiveness And Safety Of Dalteparin In Patients With Acute Coronary Syndromes Without ST Elevations In Clinical Practice</b>                                          | 8   | 8   | 100% |
| <b>[Eligibility] Study to Assess Safety and Efficacy of Ticagrelor (AZD6140) Versus Clopidogrel in Asian/Japanese Patients With Non-ST or ST Elevation Acute Coronary Syndromes (ACS)</b> | 7   | 7   | 100% |
| <b>[Eligibility] ATLAS</b>                                                                                                                                                                | 12  | 12  | 100% |
| <b>[Eligibility] An Efficacy and Safety Study for Rivaroxaban in Patients With Acute Coronary Syndrome</b>                                                                                | 6   | 6   | 100% |
| <b>[Eligibility] ALPACS</b>                                                                                                                                                               | 4   | 4   | 100% |
| <b>[Eligibility] Efficacy and Safety of Aliskiren and Valsartan Versus Placebo in Patients Stabilized Following an Acute Coronary Syndrome</b>                                            | 9   | 9   | 100% |
| <b>[Eligibility] Clopidogrel to Prasugrel in Acute Coronary Syndrome (ACS) Patients</b>                                                                                                   | 29  | 29  | 100% |
| <b>[Eligibility] Early Use of Rosuvastatin in Acute Coronary Syndromes:</b>                                                                                                               | 20  | 20  | 100% |

| <b>Targeting Platelet-Leukocyte Interactions</b>                                                                                                                           |    |    |      |
|----------------------------------------------------------------------------------------------------------------------------------------------------------------------------|----|----|------|
| <b>[Eligibility] A Comparison of Prasugrel and Clopidogrel in Acute Coronary Syndrome Subjects (TRILOGY ACS)</b>                                                           | 16 | 16 | 100% |
| <b>[Eligibility] A Comparison of Antiplatelet Therapies in Asian Subjects With Acute Coronary Syndrome</b>                                                                 | 22 | 22 | 100% |
| <b>[Eligibility] Phase 2 Study in Vascular Inflammation on Patients After an Acute Coronary Syndrome Event</b>                                                             | 23 | 23 | 100% |
| <b>[Eligibility] A Comparison of Prasugrel (CS-747) and Clopidogrel in Acute Coronary Syndrome Subjects Who Are to Undergo Percutaneous Coronary Intervention</b>          | 16 | 16 | 100% |
| <b>[Eligibility] A Phase IV Study of the Onset and Maintenance of the Antiplatelet Effect of Ticagrelor Compared With Clopidogrel in Chinese Patients With ACS (HouYi)</b> | 16 | 16 | 100% |
| <b>[Eligibility] Patient-Centered Adherence Intervention After Acute Coronary Syndrome (ACS) Hospitalization (MEDICATION)</b>                                              | 6  | 6  | 100% |
| <b>[Eligibility] The Effect on Blood Cells, Known as Platelets, Using Prasugrel vs Clopidogrel in Patients With the Heart Problem Acute Coronary Syndrome (ACS)</b>        | 15 | 15 | 100% |
| <b>[Eligibility] Effect of Prasugrel on Platelets After One Week in Patients Already Taking Clopidogrel After a Cardiac Event (SWAP)</b>                                   | 18 | 17 | 94%  |
| <b>[Eligibility] Switching From Fondaparinux to Bivalirudin or Unfractionated Heparin in ACS Patients Undergoing PCI (SWITCHIII)</b>                                       | 36 | 36 | 100% |
| <b>[Eligibility] Randomized Investigation of Chest Pain Diagnostic Strategies</b>                                                                                          | 22 | 22 | 100% |
| <b>[Eligibility] Mojito Study (Mashed Or Just Integral Pill of TicagrelOr ? )</b>                                                                                          | 29 | 29 | 100% |
| <b>[Eligibility] A Comparison of Prasugrel at PCI or Time of Diagnosis of Non-ST Elevation Myocardial Infarction (ACCOAST)</b>                                             | 15 | 14 | 93%  |
| <b>[Eligibility] Early Versus Delayed Timing of Intervention in Patients With Acute Coronary Syndromes (TIMACS)</b>                                                        | 10 | 9  | 100% |
| <b>[Eligibility] Fondaparinux Trial With Unfractionated Heparin (UFH) During Revascularization in Acute Coronary Syndromes (ACS) (FUTURA/OASIS 8)</b>                      | 32 | 32 | 100% |
| <b>[Eligibility] Evaluation of a New Cardiac Biomarker Assay</b>                                                                                                           | 10 | 10 | 100% |
| <b>[Eligibility] Multicenter Study to Rule Out Myocardial Infarction by Cardiac Computed Tomography (ROMICAT-II)</b>                                                       | 35 | 35 | 100% |
| <b>[Eligibility] Perioperative Management of Patients With Coronary Stents Undergoing Noncardiac Surgery (RegistStents)</b>                                                | 12 | 12 | 100% |
| <b>[Eligibility] A Clinical Trial Comparing Cangrelor to Clopidogrel Standard Therapy in Subjects Who Require Percutaneous Coronary Intervention</b>                       | 24 | 24 | 100% |

|                                                                                                                                                                                                                                                                  |      |      |      |
|------------------------------------------------------------------------------------------------------------------------------------------------------------------------------------------------------------------------------------------------------------------|------|------|------|
| <b>(PCI) (CHAMPION PHOENIX)</b>                                                                                                                                                                                                                                  |      |      |      |
| <b>[Eligibility] Maintenance of Platelet Inhibition With Cangrelor (Bridge)</b>                                                                                                                                                                                  | 9    | 9    | 100% |
| <b>[Eligibility] Trial to Assess the Safety and Effects of Vorapaxar in Japanese Subjects With Acute Coronary Syndrome</b>                                                                                                                                       | 28   | 28   | 100% |
| <b>[Eligibility] RE-DEEM Dose Finding Study for Dabigatran Etexilate in Patients With Acute Coronary Syndrome</b>                                                                                                                                                | 10   | 10   | 100% |
| <b>[Eligibility] Risk Markers in the Acute Coronary Syndromes (RACS)</b>                                                                                                                                                                                         | 7    | 7    | 100% |
| <b>[Eligibility] Clinical Effects of Eptifibatide Administration in High Risk Patients Presenting With Non-ST Segment Elevation Acute Coronary Syndrome (NSTEMI-ACS) Requiring Urgent Coronary Artery Bypass Graft Surgery in Short- and Long-Term Follow-up</b> | 26   | 26   | 100% |
| <b>[Eligibility] Myocardial Ischemia and Transfusion (MINT)</b>                                                                                                                                                                                                  | 17   | 17   | 100% |
|                                                                                                                                                                                                                                                                  | 572  | 569  | 100% |
|                                                                                                                                                                                                                                                                  | 3710 | 3637 | 97%  |
