# Supplementary material for: Common Data Elements for Acute Coronary Syndrome: Analysis Based on the Unified Medical Language System
Source: PubMed Central journal article supplement (PMC6729118; doi:10.2196/14107), 2019-08-23
Supplement: medinform_v7i3e14107_app3.pdf [file medinform_v7i3e14107_app3.pdf]

# 1 TABLE A3: FREQUENCIES OF ALL ANALYZED CONCEPTS

| Suggested UMLS-Code | Concept Name                             | Included Concepts                                                                                                                                                                                                                                                                                                                                                        | Data-Type | Codelist | Unit of measurement | Absolute Frequency |
|---------------------|------------------------------------------|--------------------------------------------------------------------------------------------------------------------------------------------------------------------------------------------------------------------------------------------------------------------------------------------------------------------------------------------------------------------------|-----------|----------|---------------------|--------------------|
| <b>C1532338</b>     | Percutaneous Coronary Intervention (PCI) | History of PCI, Percutaneous coronary revascularization, History of revascularization, Reason for delay in PCI, Date of most recent PCI, Indication for PCI, Contraindication for PCI, Reperfusion therapy, Primary PCI, Patient refused PCI, Total number of PCI procedures, Date of Coronary Revascularization, Reason for Revascularization, Urgent revascularization |           |          |                     | 98                 |
| <b>C0038454</b>     | Stroke/TIA                               | History of Stroke, TIA, History of TIA, Type of stroke, Date of most recent stroke, Hemorrhagic stroke                                                                                                                                                                                                                                                                   | Bool      |          |                     | 77                 |
| <b>C0001779</b>     | Date of birth                            | Age                                                                                                                                                                                                                                                                                                                                                                      | DateTime  |          |                     | 73                 |
| <b>C0019080</b>     | Hemorrhage other than stroke             | Gastrointestinal bleeding, Major bleed, Minor bleed, Intracranial hemorrhage, History of bleeding from GI system, Bleeding treatment, Date of hemorrhage, Bleeding location, Spontaneous bleed, Re-operation due to bleeding                                                                                                                                             | Bool      |          |                     | 69                 |
| <b>C0010055</b>     | Coronary Artery Bypass                   | History of CABG, Date of most                                                                                                                                                                                                                                                                                                                                            |           |          |                     | 53                 |

|                 |                       |                                                                                                                                                                        |           |  |  |    |
|-----------------|-----------------------|------------------------------------------------------------------------------------------------------------------------------------------------------------------------|-----------|--|--|----|
|                 | Graft (CABG)          | recent CABG, Date of CABG                                                                                                                                              |           |  |  |    |
| <b>C0002962</b> | Angina pectoris       | Unstable angina pectoris, CCS Classification, History of Angina, Angina, Stable angina pectoris, Secondary cause of angina                                             | Bool      |  |  | 48 |
| <b>C0871470</b> | Blood pressure        | Systolic Blood Pressure, Diastolic Blood Pressure, Blood Pressure                                                                                                      | ItemGroup |  |  | 47 |
| <b>C1306577</b> | Death                 | Date of death, Cause of death, Time of Death, Survival status at discharge, Discharge status, Death witnessed                                                          | ItemGroup |  |  | 47 |
| <b>C0085532</b> | Coronary Angiography  | Cardiac Catheterization, Lävokardiographie, Prior catheterization, Indication for coronary angiography, Date of Coronary angiography, Contraindication for angiography |           |  |  | 46 |
| <b>C0027051</b> | Myocardial infarction | History of myocardial infarction, Date of most recent MI, Acute MI, Isolated posterior MI, Recurrent MI, Posterior Infarction                                          | Bool      |  |  | 44 |
| <b>C0018801</b> | Heart failure         | CHF, History of heart failure, Date of heart failure, Heart failure, Dekomp. Herzinsuffizienz                                                                          | Bool      |  |  | 43 |
| <b>C0004057</b> | Aspirin/ASS           | Aspirin contraindication, Asprin discharge, Aspirin in first 24h,                                                                                                      |           |  |  | 42 |

|                 |                     |                                                                                                                                                      |       |  |     |    |
|-----------------|---------------------|------------------------------------------------------------------------------------------------------------------------------------------------------|-------|--|-----|----|
|                 |                     | Aspirin dose                                                                                                                                         |       |  |     |    |
| <b>C0040044</b> | Thrombolytics       | Thrombolytics contraindication, Fibrinolytics, Date of Fibrinolytic, Thrombolytic dosage, Plättchenhemmer                                            |       |  |     | 42 |
| <b>C0523952</b> | Troponin            | Troponin I, Troponin T, Peak troponin value, Troponin T ULN, Troponin I ULN                                                                          | Float |  |     | 40 |
| <b>C1299487</b> | Patient name        | Patient initials, Patient middle name, Patient first name, Patient last name                                                                         | Text  |  |     | 40 |
| <b>C0070166</b> | Clopidogrel         | Clopidogrel contraindicated, Clopidogrel dosage, Clopidogrel (discharge), Clopidogrel time, start time                                               |       |  |     | 36 |
| <b>C0011849</b> | Diabetes mellitus   | Diabetes therapy, Insulin use, Insulin, Oral diabetes treatment                                                                                      | Bool  |  |     | 31 |
| <b>C0523584</b> | CK-MB               | CK-MB ULN, CK-MB peak value                                                                                                                          | Float |  |     | 31 |
| <b>C0018810</b> | Heart rate          |                                                                                                                                                      | Float |  | bpm | 30 |
| <b>C0151744</b> | Myocardial ischemia | ECG signs of myocardial ischemia, ECG abnormal for ischemia, Recurrent ischemic symptoms, Number of all other episodes of cardiac ischaemic symptoms | Bool  |  |     | 30 |
| <b>C0003280</b> | Anticoagulation     | Oral anticoagulants, Contraindication to anticoagulation, Anticoagulant therapy, Indication for                                                      |       |  |     | 29 |

|                 |                                      |                                                                                                               |          |                     |    |    |
|-----------------|--------------------------------------|---------------------------------------------------------------------------------------------------------------|----------|---------------------|----|----|
|                 |                                      | anticoagulation, Anticoagulant (parenteral), Anticoagulant start date, Stop date, Dose                        |          |                     |    |    |
| <b>C0013798</b> | Electrocardiogram                    | Time of ECG, ECG time, ECG findings                                                                           |          |                     |    | 28 |
| <b>C0021430</b> | Informed consent                     | Date signed informed consent                                                                                  | Bool     |                     |    | 28 |
| <b>C0520886</b> | ST elevation                         | Anterior ST elevation, Inferior ST elevation, Lateral ST elevation                                            | Bool     |                     |    | 28 |
| <b>C0543467</b> | Surgical procedure (other than CABG) | History of surgery, Non-cardiovascular invasive procedure                                                     |          |                     |    | 28 |
| <b>C0079399</b> | Gender                               |                                                                                                               | CodeList | Male, Female, Other |    | 27 |
| <b>C0005910</b> | Weight                               |                                                                                                               | Float    |                     | kg | 25 |
| <b>C0304516</b> | Beta-Blocker                         | Beta-Blocker contraindication                                                                                 |          |                     |    | 25 |
| <b>C0549206</b> | Pregnancy                            | Pregnant woman, Pregnancy test                                                                                | Bool     |                     |    | 25 |
| <b>C0948089</b> | Acute Coronary Syndrome              |                                                                                                               | Bool     |                     |    | 25 |
| <b>C1384495</b> | Myocardial stress test               | Non-invasive stress test, Stress echocardiography, Stress test pos/neg, Stress test date, Date of stress test |          |                     |    | 25 |
| <b>C1536220</b> | STEMI                                | Anterior STEMI, STEMI date                                                                                    | Bool     |                     |    | 25 |
| <b>C0035078</b> | Impaired renal function              | Renal insufficiency, Renal failure, Chronic renal disease, Renal insufficiency                                | Bool     |                     |    | 24 |
| <b>C3536766</b> | Low molecular weight                 | Enoxaparin, LMWH contraindication, LMWH start                                                                 |          |                     |    | 24 |

|                 |                                    |                                                                                                                                                                                                         |          |                                                                   |    |    |
|-----------------|------------------------------------|---------------------------------------------------------------------------------------------------------------------------------------------------------------------------------------------------------|----------|-------------------------------------------------------------------|----|----|
|                 | heparin                            | date, LMWH dose                                                                                                                                                                                         |          |                                                                   |    |    |
| <b>C0036980</b> | Cardiogenic shock                  | IV Cardiogenic shock: Signs include hypotension (systolic pressure of 9 mmHg or less) and evidence of peripheral vasoconstriction such as oliguria, cyanosis and diaphoresis, Date of cardiogenic shock | Bool     |                                                                   |    | 23 |
| <b>C0360714</b> | Statins                            | Statin contraindicated, Statins before admission, Statin dose                                                                                                                                           |          |                                                                   |    | 23 |
| <b>C1620287</b> | Prasugrel                          | Prasugrel Dose, Prasugrel contraindicated, Prasugel start time                                                                                                                                          |          |                                                                   |    | 23 |
| <b>C0003015</b> | ACE Inhibitors                     | ACE inhibitor contraindicated                                                                                                                                                                           |          |                                                                   |    | 22 |
| <b>C3640054</b> | Glycoprotein 2b/3a inhibitors      | Iib/IIIa blocker dosage, Iib/IIIa start time, Reason for GP .. Administration, Stop Date, Contraindiacted                                                                                               |          |                                                                   |    | 22 |
| <b>C0005890</b> | Height                             |                                                                                                                                                                                                         | Float    |                                                                   | cm | 21 |
| <b>C0020538</b> | Hypertension                       | History of Hypertension, Hypertensive crisis                                                                                                                                                            | Bool     |                                                                   |    | 21 |
| <b>C0232187</b> | Cardiac rhythm                     | Sinus rhythm, cardiac arrhythmia, Atrial arrhythmia                                                                                                                                                     | CodeList | Sinus rhythm, Atrial fibrillation or flutter, Paced, Other rhythm |    | 21 |
| <b>C0428772</b> | Left ventricular ejection fraction | LVEF planned for after discharge, Linksventrikuläre Funktion, LVEF assessed                                                                                                                             | Float    |                                                                   | %  | 21 |
| <b>C0520887</b> | ST depression                      | Inferior ST depression, Anterior ST depression, Lateral ST                                                                                                                                              | Bool     |                                                                   |    | 21 |

|                 |                                    |                                                                                                         |          |  |  |    |
|-----------------|------------------------------------|---------------------------------------------------------------------------------------------------------|----------|--|--|----|
|                 |                                    | depression                                                                                              |          |  |  |    |
| <b>C0521942</b> | Angiotensin 2 Receptor Antagonists | ARB Contraindication, ARC contraindicated                                                               |          |  |  | 21 |
| <b>C1999375</b> | Ticagrelor                         | Ticagrelor dosage, Ticagrelor contraindication, Ticagrelor start time                                   |          |  |  | 21 |
| <b>C2825026</b> | Unfractionated heparin             | Unfractionated heparin contraindication, Unfractionated heparin dose, Unfractionated heparin start time |          |  |  | 21 |
| <b>C0013516</b> | Echocardiography                   | Date of Echocardiogram                                                                                  |          |  |  | 20 |
| <b>C0030163</b> | Cardiac Pacemaker                  | Pacemaker implantation, Paced rhythm, Permanent pacemaker, Temporary pacemaker                          |          |  |  | 25 |
| <b>C0201976</b> | Creatinine                         | Peak Creatinine                                                                                         | Float    |  |  | 20 |
| <b>C0543414</b> | Tobacco consume                    |                                                                                                         | Bool     |  |  | 20 |
| <b>C2584899</b> | Date of examination                |                                                                                                         |          |  |  | 20 |
| <b>C0019046</b> | Hemoglobin                         | Anaemia                                                                                                 | Float    |  |  | 18 |
| <b>C1320532</b> | Arrival time at hospital/ER        | Arrival date, Presentation date/time                                                                    | DateTime |  |  | 18 |
| <b>C3537184</b> | NSTEMI                             |                                                                                                         | Bool     |  |  | 18 |
| <b>C2361123</b> | Date of discharge                  | Time of hospital discharge for index event                                                              | DateTime |  |  | 17 |
| <b>C1320528</b> | Time of symptom onset              | Duration of symptoms, Onset date of index event                                                         | DateTime |  |  | 16 |
| <b>C1879316</b> | Transfusion of blood               | Date of first transfusion, Declines blood transfusion                                                   |          |  |  | 16 |

|                 |                                  |                                                                                             |          |  |  |    |
|-----------------|----------------------------------|---------------------------------------------------------------------------------------------|----------|--|--|----|
| <b>C0021860</b> | Intra-aortic balloon pump        |                                                                                             |          |  |  | 15 |
| <b>C0043031</b> | Warfarin                         | Warfarin contraindicated                                                                    |          |  |  | 15 |
| <b>C0429090</b> | Significant Q waves              | Q waves in anterior leads, Q waves in inferior leads, significant Q waves in anterior leads | Bool     |  |  | 15 |
| <b>C1273352</b> | Intracardial defibrillator (ICD) | Temporary pacemaker ICD, ICD implantation date                                              |          |  |  | 15 |
| <b>C0023211</b> | Left bundle branch block         |                                                                                             | Bool     |  |  | 14 |
| <b>C0085605</b> | Impaired hepatic function        | Chronic liver disease                                                                       | Bool     |  |  | 14 |
| <b>C1302393</b> | Date of admission                |                                                                                             | DateTime |  |  | 14 |
| <b>C0011900</b> | Diagnosis                        | Präoperative diagnosis                                                                      | Text     |  |  | 13 |
| <b>C0013404</b> | Dyspnea                          |                                                                                             | Bool     |  |  | 13 |
| <b>C0018821</b> | Cardiac surgery                  |                                                                                             |          |  |  | 13 |
| <b>C0040405</b> | X-ray tomography                 | CT location                                                                                 |          |  |  | 0  |
| <b>C0525032</b> | INR                              | Quick, Quick                                                                                | Float    |  |  | 13 |
| <b>C1553892</b> | Current medication list          | On blood pressure treatment, Medication list                                                |          |  |  | 13 |
| <b>C3251812</b> | Increased bleeding risk          |                                                                                             | Bool     |  |  | 13 |
| <b>C0004238</b> | Atrial fibrillation              | Atrial fibrillation date, Vfib date                                                         | Bool     |  |  | 12 |
| <b>C0008031</b> | Chest pain                       |                                                                                             | Bool     |  |  | 12 |
| <b>C0018790</b> | Cardiac arrest                   | Date of cardiac arrest, Cardiac                                                             | Bool     |  |  | 12 |

|                 |                                          |                                                                               |       |  |  |    |
|-----------------|------------------------------------------|-------------------------------------------------------------------------------|-------|--|--|----|
|                 |                                          | arrest outside facility                                                       |       |  |  |    |
| <b>C0019993</b> | Hospitalization since previous visit     |                                                                               | Bool  |  |  | 12 |
| <b>C0024485</b> | MRI imaging                              | Contraindications to MRI                                                      |       |  |  | 6  |
| <b>C0455404</b> | Family history of coronary heart disease | Familienanamnese                                                              | Bool  |  |  | 12 |
| <b>C0017887</b> | Nitrates                                 | Oral Nitrates, Amount of sublingual nitrates, Topical nitrates, Nitroglycerin | Float |  |  | 11 |
| <b>C0020517</b> | Allergies                                | Allergy to study drug                                                         | Text  |  |  | 11 |
| <b>C0087153</b> | Ventilator                               |                                                                               |       |  |  | 11 |
| <b>C0190658</b> | Pulmonary Artery Catheter                | Swan Gans Catheter                                                            |       |  |  | 11 |
| <b>C0201973</b> | Creatine Kinase                          | CK maximum value, CK ULN                                                      | Float |  |  | 11 |
| <b>C0421449</b> | Patient address                          | Street                                                                        | Text  |  |  | 11 |
| <b>C0520888</b> | Pathological T wave                      | T inversion                                                                   | Bool  |  |  | 11 |
| <b>C0013801</b> | Holter monitoring                        |                                                                               |       |  |  | 10 |
| <b>C0168273</b> | Bivalirudin                              | Bivalirudin contraindicated, Bivalirudin start time                           |       |  |  | 10 |
| <b>C0220825</b> | Evaluation                               |                                                                               |       |  |  | 10 |
| <b>C0242339</b> | Dyslipidaemia                            | Hyperlipidemia                                                                | Float |  |  | 10 |
| <b>C0428472</b> | LDL Cholesterol                          |                                                                               | Float |  |  | 10 |
| <b>C0679831</b> | Patient history                          | Medical history                                                               |       |  |  | 10 |
| <b>C1445957</b> | Total cholesterol                        | Hypercholesterinemia                                                          | Float |  |  | 10 |



|                 |                                 |                                                                                                 |           |  |  |    |
|-----------------|---------------------------------|-------------------------------------------------------------------------------------------------|-----------|--|--|----|
| <b>C1546432</b> | Transfer from other hospital    | Date of transfer, Time of transfer                                                              | DateTime  |  |  | 10 |
| <b>C1550330</b> | Urgency                         | Urgent procedure                                                                                |           |  |  | 10 |
| <b>C1881056</b> | Peripheral arterial disease     |                                                                                                 | Bool      |  |  | 10 |
| <b>C3272316</b> | Cardiac stent placement         | Insertion of Drug Coated Stent(s), Stent type                                                   |           |  |  | 10 |
| <b>C0005821</b> | Platelet count                  | Thrombocytopenia                                                                                | Float     |  |  | 9  |
| <b>C0006826</b> | Malignom                        | Intracranial neoplasm, Tumorerkrankungen                                                        | Bool      |  |  | 9  |
| <b>C0085612</b> | Ventricular arrhythmia          |                                                                                                 | Bool      |  |  | 9  |
| <b>C0151942</b> | Other arterial thrombotic event |                                                                                                 | Bool      |  |  | 9  |
| <b>C0181598</b> | Left ventricular assist device  |                                                                                                 | Bool      |  |  | 9  |
| <b>C0242231</b> | Coronary stenosis               | RCA, PDA, RPL and AM branches percent stenosis                                                  | Bool      |  |  | 9  |
| <b>C0332144</b> | Final/discharge diagnosis       |                                                                                                 | Text      |  |  | 9  |
| <b>C0421454</b> | Post code                       |                                                                                                 | Text      |  |  | 9  |
| <b>C0600290</b> | Rehospitalization               | Readmission reason, Readmission date, Gesamtzahl aller Rehospitalisationen, Date of Readmission | ItemGroup |  |  | 9  |
| <b>C0677490</b> | Pulmonary angiography           |                                                                                                 |           |  |  | 9  |
| <b>C0877248</b> | Adverse events                  |                                                                                                 | Text      |  |  | 9  |

|                 |                            |                                                                                   |          |  |  |   |
|-----------------|----------------------------|-----------------------------------------------------------------------------------|----------|--|--|---|
| <b>C1096021</b> | Antiplatelet therapy       |                                                                                   |          |  |  | 9 |
| <b>C1320303</b> | Visit date                 |                                                                                   | DateTime |  |  | 9 |
| <b>C1446476</b> | Electrophysiology study    |                                                                                   | Bool     |  |  | 9 |
| <b>C2348585</b> | Patient ID                 |                                                                                   | Text     |  |  | 9 |
| <b>C3177142</b> | Symptoms at admission      | Reason for hospitalization, Primary reason for hospitalization, Clinical symptoms | Text     |  |  | 9 |
| <b>C0002007</b> | Aldosterone Blocking Agent | Aldosterone blocking agent contraindicated, Dose                                  |          |  |  | 8 |
| <b>C0012798</b> | Diuretics                  |                                                                                   |          |  |  | 8 |
| <b>C0040207</b> | Ticlopidine                | Ticlopidine dose, Ticlopidin contraindicated                                      |          |  |  | 8 |
| <b>C0201657</b> | CRP                        |                                                                                   | Float    |  |  | 8 |
| <b>C0560738</b> | Ventilation/perfusion scan |                                                                                   |          |  |  | 8 |
| <b>C0581603</b> | Revascularization          |                                                                                   |          |  |  | 8 |
| <b>C0589120</b> | Follow up                  | Follow up date                                                                    | DateTime |  |  | 8 |
| <b>C0948369</b> | Reinfarction               | Reinfarction date                                                                 | Bool     |  |  | 8 |
| <b>C2348568</b> | Study participation status |                                                                                   | Text     |  |  | 8 |
| <b>C2361125</b> | Attending physician name   | Physician name, Physician name, Resident physician name                           | Text     |  |  | 8 |
| <b>C3272266</b> | TIMI Score                 |                                                                                   | Integer  |  |  | 8 |
| <b>C0003367</b> | Non-statin lipid           |                                                                                   |          |  |  | 7 |

|                 |                                |                                       |          |                                        |  |   |
|-----------------|--------------------------------|---------------------------------------|----------|----------------------------------------|--|---|
|                 | lowering agent                 |                                       |          |                                        |  |   |
| <b>C0007203</b> | Cardiopulmonary Resuscitation  |                                       |          |                                        |  | 7 |
| <b>C0019004</b> | Hemodialysis                   |                                       |          |                                        |  | 7 |
| <b>C0232326</b> | ST-segment changes             | Nonspecific ST/T Change, ST deviation | Bool     |                                        |  | 7 |
| <b>C0332135</b> | Working diagnosis on admission | Führende Diagnose nach Herzkatheter   | Text     |                                        |  | 7 |
| <b>C0428474</b> | Serum LDL measurement          |                                       | Float    |                                        |  | 7 |
| <b>C0700589</b> | Contraception                  | Kontrazeptiva                         |          |                                        |  | 7 |
| <b>C0948268</b> | Hemodynamic instability        | Hemodynamics                          | Bool     |                                        |  | 7 |
| <b>C1098510</b> | Fondaparinux                   | Contraindication to fondaparinux      |          |                                        |  | 7 |
| <b>C1271630</b> | Cardiac biomarker measurements |                                       | Float    |                                        |  | 7 |
| <b>C1299364</b> | Culprit artery                 | Bypass stenosis                       | CodeList | LAD, LCx, RCA, LM, Graft/Stent,Unknown |  | 7 |
| <b>C1956346</b> | Coronary Artery Disease        | History of Coronary Artery disease    | Bool     |                                        |  | 7 |
| <b>C0001948</b> | Alcohol consumption            | History of alcohol consumption        | Text     |                                        |  | 6 |
| <b>C0002940</b> | Aneurysm                       | Aneurysma, Intracranial aneurysm      | Bool     |                                        |  | 6 |
| <b>C0015031</b> | Ethnic group                   |                                       | CodeList |                                        |  | 6 |
| <b>C0018935</b> | Hematocrit                     |                                       | Float    |                                        |  | 6 |

|                 |                                |                                                                                                             |          |  |  |   |
|-----------------|--------------------------------|-------------------------------------------------------------------------------------------------------------|----------|--|--|---|
| <b>C0019018</b> | HbA1c                          |                                                                                                             | Float    |  |  | 6 |
| <b>C0021672</b> | Insurance                      |                                                                                                             | Text     |  |  | 6 |
| <b>C0030605</b> | PTT                            |                                                                                                             | Float    |  |  | 6 |
| <b>C0034510</b> | Race                           |                                                                                                             | CodeList |  |  | 6 |
| <b>C0202042</b> | Blood Glucose                  | Fasting Glucose                                                                                             | Float    |  |  | 6 |
| <b>C0202236</b> | Triglycerides                  |                                                                                                             | Float    |  |  | 6 |
| <b>C2024081</b> | Number of stents               | Number of drug eluting stents,<br>Number of bare metal stents                                               |          |  |  | 6 |
| <b>C2024776</b> | Cardiac risk factors           | History and risk factors,<br>Cardiovascular risk factors, risk<br>factor for cardiovascular<br>complication | Bool     |  |  | 6 |
| <b>C2348066</b> | Dabigatran                     | Dabigatran contraindicated                                                                                  |          |  |  | 6 |
| <b>C2983649</b> | QRS annotation                 | QRS duration                                                                                                | Bool     |  |  | 6 |
| <b>C3258270</b> | Means of transport             | Means of transfer                                                                                           |          |  |  | 6 |
| <b>C0003211</b> | NSAIDs (other than<br>Aspirin) |                                                                                                             |          |  |  | 5 |
| <b>C0003857</b> | Arteriovenous<br>malformation  |                                                                                                             | Bool     |  |  | 5 |
| <b>C0017654</b> | GFR                            |                                                                                                             | Float    |  |  | 5 |
| <b>C0023508</b> | White blood cell count         | Leukozyten                                                                                                  | Float    |  |  | 5 |
| <b>C0031809</b> | Physical examination           |                                                                                                             |          |  |  | 5 |
| <b>C0040034</b> | Thrombocytopenia               |                                                                                                             | Float    |  |  | 5 |
| <b>C0087111</b> | Procedure                      |                                                                                                             |          |  |  | 5 |

|                 |                            |                      |          |  |    |   |
|-----------------|----------------------------|----------------------|----------|--|----|---|
| <b>C0243095</b> | Findings                   |                      |          |  |    | 5 |
| <b>C0455829</b> | Waist circumference        |                      | Float    |  | cm | 5 |
| <b>C1515258</b> | Telephone number           |                      | Text     |  |    | 5 |
| <b>C1858274</b> | Reduced life expectancy    |                      | Bool     |  |    | 5 |
| <b>C2315323</b> | Indication                 |                      |          |  |    | 5 |
| <b>C2936588</b> | Thienopyridine             |                      |          |  |    | 5 |
| <b>C3275120</b> | Number of diseased vessels |                      | Integer  |  |    | 5 |
| <b>C3838354</b> | Arrival time at Cath Lab   |                      | DateTime |  |    | 5 |
| <b>C0004245</b> | AV block                   |                      | Bool     |  |    | 4 |
| <b>C0006684</b> | Calcium channel blocker    |                      |          |  |    | 4 |
| <b>C0007177</b> | Cardiac Tamponade          |                      | Bool     |  |    | 4 |
| <b>C0013604</b> | Edema                      |                      | Bool     |  |    | 4 |
| <b>C0014772</b> | Red blood cell count       |                      | Float    |  |    | 4 |
| <b>C0015259</b> | Exercise                   | Excercise counseling |          |  |    | 4 |
| <b>C0018818</b> | Ventricular Septal Defect  | Septal defect        | Bool     |  |    | 4 |
| <b>C0021641</b> | Insulin                    |                      |          |  |    | 4 |
| <b>C0042514</b> | Ventricular tachycardia    | Vtach date           | Bool     |  |    | 4 |
| <b>C0201836</b> | Alanine aminotransferase   |                      | Float    |  |    | 4 |
| <b>C0201899</b> | Aspartate aminotransferase |                      | Float    |  |    | 4 |

|                             |                                |                |          |  |  |   |
|-----------------------------|--------------------------------|----------------|----------|--|--|---|
| <b>C0202230</b>             | TSH                            |                | Float    |  |  | 4 |
| <b>C0253563</b>             | Eptifibatide                   |                |          |  |  | 4 |
| <b>C0337443</b>             | Sodium                         |                | Float    |  |  | 4 |
| <b>C0369183</b>             | MCH                            |                | Float    |  |  | 4 |
| <b>C0421456</b>             | Occupation                     | Berufsanamnese | Text     |  |  | 4 |
| <b>C0474535</b>             | MCHC                           |                | Float    |  |  | 4 |
| <b>C0570562</b>             | Allergy to contrast medium     |                | Bool     |  |  | 4 |
| <b>C0700431</b>             | Cardiac rehabilitation         |                |          |  |  | 4 |
| <b>C0741921</b>             | Cardiac markers elevated       |                | Float    |  |  | 4 |
| <b>C1273715</b>             | Smoking counseling             |                |          |  |  | 4 |
| <b>C1948043</b>             | MCV                            |                | Float    |  |  | 4 |
| <b>C2267235</b>             | Vitamin-K antagonists          |                |          |  |  | 4 |
| <b>C2348570</b>             | Premature termination of study |                | Bool     |  |  | 4 |
| <b>C3272298</b>             | Arterial access site           |                |          |  |  | 4 |
| <b>C3536847</b>             | Oral Thrombin inhibitor        |                |          |  |  | 4 |
| <b>[C0023303, C0021708]</b> | Days spent in ICU              |                | Integer  |  |  | 3 |
| <b>[C0184666, C0450429]</b> | Admission location             |                |          |  |  | 3 |
| <b>[C3261085, C1264639]</b> | EMS dispatch time              |                | DateTime |  |  | 3 |

|                 |                      |                             |       |  |    |   |
|-----------------|----------------------|-----------------------------|-------|--|----|---|
| <b>C0004096</b> | Asthma               |                             | Bool  |  |    | 3 |
| <b>C0004239</b> | Atrial Flutter       |                             | Bool  |  |    | 3 |
| <b>C0005902</b> | Body surface area    |                             | Float |  | qm | 3 |
| <b>C0009566</b> | Complications        |                             | Text  |  |    | 3 |
| <b>C0009924</b> | Contrast medium      | Kontrastmittelmenge         |       |  |    | 3 |
| <b>C0011946</b> | Dialysis             |                             |       |  |    | 3 |
| <b>C0020443</b> | Hypercholesterolemia |                             | Float |  |    | 3 |
| <b>C0024117</b> | COPD                 |                             | Bool  |  |    | 3 |
| <b>C0026266</b> | Mitral regurgitation |                             | Bool  |  |    | 3 |
| <b>C0031050</b> | Pericard             |                             |       |  |    | 3 |
| <b>C0031444</b> | Marcumar             |                             |       |  |    | 3 |
| <b>C0073633</b> | Ranolazine           |                             |       |  |    | 3 |
| <b>C0202194</b> | Potassium            |                             | Float |  |    | 3 |
| <b>C0206461</b> | Dalteparin           | Dalteparin contraindicated  |       |  |    | 3 |
| <b>C0304509</b> | Inotropic agent      |                             |       |  |    | 3 |
| <b>C0332677</b> | Trauma               | History of trauma           | Bool  |  |    | 3 |
| <b>C0360703</b> | Antiarrhythmics      | Antiarrhythmics (discharge) |       |  |    | 3 |
| <b>C0429028</b> | QT interval          | QT                          | Text  |  |    | 3 |
| <b>C0455713</b> | Type of procedure    |                             |       |  |    | 3 |
| <b>C0457617</b> | Mechanical support   |                             |       |  |    | 3 |
| <b>C0577789</b> | Aortic valve         |                             |       |  |    | 3 |
| <b>C0577791</b> | Mitral valve         |                             |       |  |    | 3 |

|                             |                                            |                                                                          |          |  |       |   |
|-----------------------------|--------------------------------------------|--------------------------------------------------------------------------|----------|--|-------|---|
| <b>C0577797</b>             | Tricuspid valve                            |                                                                          |          |  |       | 3 |
| <b>C0745041</b>             | Event prolonged hospitalization            |                                                                          |          |  |       | 3 |
| <b>C0849535</b>             | Lab results                                |                                                                          |          |  |       | 3 |
| <b>C1095989</b>             | BNP                                        |                                                                          | Float    |  |       | 3 |
| <b>C1112720</b>             | Unspecific ST changes                      |                                                                          | Bool     |  |       | 3 |
| <b>C1305855</b>             | Body mass index                            |                                                                          | Float    |  | kg/qm | 3 |
| <b>C1510472</b>             | Drug dependence                            | Documented or self-reported cocaine use within the past 48 hours (acute) | Bool     |  |       | 3 |
| <b>C1739768</b>             | Rivaroxaban                                | Contraindication                                                         |          |  |       | 3 |
| <b>C1831808</b>             | Apixaban                                   | Contraindication                                                         |          |  |       | 3 |
| <b>C1959586</b>             | Cardiac Wall rupture                       | Cardiac rupture                                                          | Bool     |  |       | 3 |
| <b>C2348485</b>             | X-ray Exposure time                        |                                                                          |          |  |       | 3 |
| <b>C2733251</b>             | EQ-5D-3L Quality of Life                   |                                                                          | Text     |  |       | 3 |
| <b>[C0011008, C3495034]</b> | Time of transfer from Emergency department |                                                                          | DateTime |  |       | 2 |
| <b>C0003873</b>             | Rheumatoid arthritis                       |                                                                          | Bool     |  |       | 2 |
| <b>C0004398</b>             | Autopsy performed                          |                                                                          | Bool     |  |       | 2 |
| <b>C0004936</b>             | Mental illness                             |                                                                          | Bool     |  |       | 2 |
| <b>C0005903</b>             | Body temperature                           |                                                                          | Float    |  | °C    | 2 |
| <b>C0007282</b>             | Carotid stenosis                           |                                                                          | Bool     |  |       | 2 |
| <b>C0007412</b>             | Catecholamines                             |                                                                          |          |  |       | 2 |



|                 |                              |  |         |  |  |   |
|-----------------|------------------------------|--|---------|--|--|---|
| <b>C0010520</b> | Cyanosis                     |  | Bool    |  |  | 2 |
| <b>C0012265</b> | Digoxin                      |  |         |  |  | 2 |
| <b>C0017319</b> | Primary physician            |  | Text    |  |  | 2 |
| <b>C0018823</b> | History of heart transplant  |  |         |  |  | 2 |
| <b>C0020649</b> | Hypotension                  |  | Bool    |  |  | 2 |
| <b>C0022671</b> | History of kidney transplant |  | Bool    |  |  | 2 |
| <b>C0023303</b> | Length of stay               |  | Integer |  |  | 2 |
| <b>C0030657</b> | Infectivity                  |  |         |  |  | 2 |
| <b>C0034065</b> | Pulmonary embolism           |  | Bool    |  |  | 2 |
| <b>C0035234</b> | Breathing sound              |  | Text    |  |  | 2 |
| <b>C0038418</b> | Streptokinase                |  |         |  |  | 2 |
| <b>C0039070</b> | Syncope                      |  | Bool    |  |  | 2 |
| <b>C0040338</b> | Snusning                     |  | Bool    |  |  | 2 |
| <b>C0042071</b> | Urokinase                    |  |         |  |  | 2 |
| <b>C0042510</b> | Ventricular fibrillation     |  | Bool    |  |  | 2 |
| <b>C0085615</b> | Right branch bundle block    |  | Bool    |  |  | 2 |
| <b>C0150521</b> | Comfort measures only        |  |         |  |  | 2 |
| <b>C0151814</b> | Coronary Occlusion           |  | Bool    |  |  | 2 |
| <b>C0161817</b> | Vascular complication        |  | Text    |  |  | 2 |
| <b>C0190173</b> | Valve replacement            |  |         |  |  | 2 |

|                 |                               |  |       |  |    |   |
|-----------------|-------------------------------|--|-------|--|----|---|
| <b>C0190211</b> | Angioplasty                   |  |       |  |    | 2 |
| <b>C0201913</b> | Total bilirubin               |  | Float |  |    | 2 |
| <b>C0202035</b> | Gamma-glutamyl transpeptidase |  | Float |  |    | 2 |
| <b>C0235029</b> | Neurological complications    |  | Text  |  |    | 2 |
| <b>C0247025</b> | Tirofiban                     |  |       |  |    | 2 |
| <b>C0257190</b> | Ivabradin                     |  |       |  |    | 2 |
| <b>C0288672</b> | Abciximab                     |  |       |  |    | 2 |
| <b>C0332138</b> | Secondary diagnosis           |  | Text  |  |    | 2 |
| <b>C0340643</b> | Aortic dissection             |  | Bool  |  |    | 2 |
| <b>C0358591</b> | Proton pump inhibitors        |  |       |  |    | 2 |
| <b>C0373595</b> | Creatinine Clearance          |  | Float |  |    | 2 |
| <b>C0373675</b> | Magnesium                     |  | Float |  |    | 2 |
| <b>C0392209</b> | Nutritional status            |  | Text  |  |    | 2 |
| <b>C0428977</b> | Increased risk of bradycardia |  | Bool  |  |    | 2 |
| <b>C0449462</b> | Stent length                  |  |       |  |    | 2 |
| <b>C0449494</b> | Type of graft                 |  |       |  |    | 2 |
| <b>C0450990</b> | Physical status               |  | Text  |  |    | 2 |
| <b>C0455503</b> | Depression                    |  | Bool  |  |    | 2 |
| <b>C0489625</b> | QTc time                      |  | Float |  | ms | 2 |
| <b>C0523961</b> | Urea                          |  | Float |  |    | 2 |

|                 |                                       |                 |          |  |    |   |
|-----------------|---------------------------------------|-----------------|----------|--|----|---|
| <b>C0553514</b> | Admission source                      |                 | CodeList |  |    | 2 |
| <b>C0577786</b> | Left ventricle                        |                 |          |  |    | 2 |
| <b>C0577787</b> | Right ventricle                       |                 |          |  |    | 2 |
| <b>C0681902</b> | Laboratory results                    |                 |          |  |    | 2 |
| <b>C0805839</b> | Date of last contact                  |                 | DateTime |  |    | 2 |
| <b>C1148438</b> | Current condition                     |                 |          |  |    | 2 |
| <b>C1167690</b> | PQ time                               |                 | Float    |  | ms | 2 |
| <b>C1269041</b> | Abdominal wall                        |                 |          |  |    | 2 |
| <b>C1269890</b> | Right atrium                          |                 |          |  |    | 2 |
| <b>C1269894</b> | Left atrium                           |                 |          |  |    | 2 |
| <b>C1277187</b> | Left ventricular systolic dysfunction |                 | Bool     |  |    | 2 |
| <b>C1287726</b> | Puls status                           |                 | Text     |  |    | 2 |
| <b>C1291006</b> | Lung percussion                       |                 |          |  |    | 2 |
| <b>C1291017</b> | Cardiac auscultation                  |                 |          |  |    | 2 |
| <b>C1320531</b> | Time of first medical contact         |                 | DateTime |  |    | 2 |
| <b>C1322815</b> | Drug eluting balloon                  |                 |          |  |    | 2 |
| <b>C1550373</b> | OPS-Codes                             |                 | Text     |  |    | 2 |
| <b>C2145202</b> | Brachytherapy                         |                 |          |  |    | 2 |
| <b>C2700391</b> | Procedures                            |                 |          |  |    | 2 |
| <b>C2825221</b> | Left main stenosis                    |                 | Bool     |  |    | 2 |
| <b>C2825222</b> | LAD Stenosis                          | Stenosis in LAD | Bool     |  |    | 2 |

|                 |                       |  |  |  |  |   |
|-----------------|-----------------------|--|--|--|--|---|
| <b>C3267166</b> | Right coronary artery |  |  |  |  | 2 |
| <b>C3532907</b> | Aorta                 |  |  |  |  | 2 |
