# Supplementary material for: Common Data Elements for Acute Coronary Syndrome: Analysis Based on the Unified Medical Language System
Source: PubMed Central journal article supplement (PMC6729118; doi:10.2196/14107), 2019-08-23
Supplement: medinform_v7i3e14107_app4.pdf [file medinform_v7i3e14107_app4.pdf]

# 1 TABLE A1: REVISED CDE LIST

| Concepts Name                                         | Suggested UMLS-Code | Data-Type | Codelist                |
|-------------------------------------------------------|---------------------|-----------|-------------------------|
| <b>ACS-Timepoints</b>                                 |                     |           |                         |
| <b>Timepoints</b>                                     |                     |           |                         |
| <b>Date of admission</b>                              | C1302393            | datetime  |                         |
| <b>Date of discharge</b>                              | C2361123            | datetime  |                         |
| <b>Arrival at hospital</b>                            | C1320532            | datetime  |                         |
| <b>Time of symptom onset</b>                          | C1320528            | datetime  |                         |
| <b>Follow up date</b>                                 | C3694716            | datetime  |                         |
| <b>Arrival time at Cath Lab</b>                       | C3838354            | datetime  |                         |
| <b>Days spent in ICU</b>                              | C0023303 C0021708   | integer   |                         |
| <b>EMS dispatch time</b>                              | C3261085 C1264639   | datetime  |                         |
| <b>Visit date</b>                                     | C1320303            | datetime  |                         |
| <b>Lenght of stay</b>                                 | C0023303            | integer   |                         |
| <b>Date of last contact</b>                           | C0805839            | datetime  |                         |
| <b>Time of first medical contact</b>                  | C1320531            | datetime  |                         |
| <b>Time of transfer from<br/>Emergency department</b> | C0011008 C3495034   | datetime  |                         |
| <b>Date of transfer</b>                               | C1546432            | datetime  |                         |
| <b>Means of transfer</b>                              | C0449375            | text      |                         |
| <b>Admission location</b>                             | C0450429            | text      |                         |
| <b>Patient data</b>                                   |                     |           |                         |
| <b>Patient data</b>                                   |                     |           |                         |
| <b>Date of birth</b>                                  | C0001779            | text      |                         |
| <b>Gender</b>                                         | C0079399            | text      | 1=Male 2=Female 3=Other |
| <b>Informed consent</b>                               | C0021430            | boolean   |                         |

|                                                 |          |         |  |
|-------------------------------------------------|----------|---------|--|
| <b>Tobacco consume</b>                          | C0543414 | text    |  |
| <b>Family history of coronary heart disease</b> | C0455404 | boolean |  |
| <b>Patient address</b>                          | C0421449 | text    |  |
| <b>Allergies</b>                                | C0020517 | text    |  |
| <b>Patient ID</b>                               | C2348585 | text    |  |
| <b>First name</b>                               | C1443235 | text    |  |
| <b>Study Participation status</b>               | C2348568 | boolean |  |
| <b>Insurance</b>                                | C0021672 | text    |  |
| <b>Postal code</b>                              | C0421454 | text    |  |
| <b>Ethnic Group</b>                             | C0015031 | text    |  |
| <b>Race</b>                                     | C0034510 | text    |  |
| <b>Physician name</b>                           | C2361125 | text    |  |
| <b>Telephone number</b>                         | C1515258 | text    |  |
| <b>Reduced life expectancy</b>                  | C1858274 | boolean |  |
| <b>Allergy to contrast medium</b>               | C0570562 | boolean |  |
| <b>Occupation</b>                               | C0028811 | text    |  |
| <b>Hospitalization since previous visit</b>     | C0019993 | boolean |  |
| <b>Premature termination of study</b>           | C2348570 | boolean |  |
| <b>Primary physician</b>                        | C0017319 | text    |  |
| <b>Admission source</b>                         | C0553514 | text    |  |
| <b>OPS-Codes</b>                                | C1550373 | text    |  |
|                                                 |          |         |  |
| <b>Patient name</b>                             | C1299487 |         |  |
| <b>First name</b>                               |          | text    |  |
| <b>Last Name</b>                                |          | text    |  |
| <b>Initials</b>                                 |          | text    |  |
|                                                 |          |         |  |
| <b>Patient history</b>                          |          |         |  |
|                                                 |          |         |  |
| <b>Patient history</b>                          | C0679831 |         |  |

|                                      |          |         |        |
|--------------------------------------|----------|---------|--------|
| <b>Alcohol consumption</b>           | C0001948 | boolean |        |
| <b>History of kidney transplant</b>  | C0022671 | boolean |        |
| <b>Increased risk of bradycardia</b> | C0428977 | boolean |        |
| <b>Dyslipidemia</b>                  | C0242339 | text    |        |
| <b>Thrombocytopenia</b>              |          | text    |        |
| <b>Hypercholesterolemia</b>          |          | text    |        |
| <b>History of heart transplant</b>   | C0018823 | text    |        |
| <b>Exercise</b>                      | C0015259 | boolean |        |
|                                      |          |         |        |
| <b>Laboratory</b>                    |          |         |        |
|                                      |          |         |        |
| <b>Troponin</b>                      | C0523952 |         |        |
| <b>Troponin T</b>                    | C1141947 | float   | ng/mL  |
| <b>Troponin I</b>                    | C0920210 | float   | ng/mL  |
|                                      |          |         |        |
| <b>Laboratory</b>                    | C0681902 |         |        |
| <b>Creatinine</b>                    | C0201976 | float   | mg/dL  |
| <b>Hemoglobin</b>                    | C0019046 | float   | mmol/L |
| <b>CK-MB</b>                         | C0523584 | float   | ng/mL  |
| <b>Total cholesterol</b>             | C1445957 | float   | mmol/L |
| <b>INR</b>                           | C0525032 | float   |        |
| <b>Creatine Kinase</b>               | C0201973 | float   | U/L    |
| <b>LDL Cholesterol</b>               | C0202117 | float   | mmol/L |
| <b>Platelet count</b>                | C0005821 | float   | /L     |
| <b>CRP</b>                           | C0201657 | float   | mg/L   |
| <b>LDL measurement</b>               | C0428474 | float   | mmol/L |
| <b>PTT</b>                           | C0030605 | float   | s      |
| <b>Triglycerides</b>                 | C0202236 | float   | mg/dL  |
| <b>Hematocrit</b>                    | C0518014 | float   | %      |
| <b>GFR</b>                           | C0017654 | float   | mL/min |
| <b>White blood cell count</b>        | C0023508 | float   | /L     |
| <b>Cardiac biomarker</b>             | C1271630 | text    |        |

|                                        |          |         |        |
|----------------------------------------|----------|---------|--------|
| <b>measurements</b>                    |          |         |        |
| <b>HbA1c</b>                           | C0019018 | float   | %      |
| <b>Blood Glucose</b>                   | C0202042 | float   | mg/dL  |
| <b>Alanine aminotransferase</b>        | C0201836 | float   | U/L    |
| <b>MCH</b>                             | C0369183 | float   | pg     |
| <b>Cardiac markers elevated</b>        | C0741921 | boolean |        |
| <b>Red blood cell count</b>            | C0014772 | float   | /L     |
| <b>Aspartate aminotransferase</b>      | C0201899 | float   | IU/L   |
| <b>TSH</b>                             | C0202230 | float   | mIU/L  |
| <b>Sodium</b>                          | C0337443 | float   | mmol/L |
| <b>MCV</b>                             | C1948043 | float   | fL     |
| <b>MCHC</b>                            | C0474535 | float   | g/dL   |
| <b>BNP</b>                             | C1095989 | float   | pg/mL  |
| <b>Potassium</b>                       | C0202194 | float   | mmol/L |
| <b>Total bilirubin</b>                 | C0201913 | float   | µmol/L |
| <b>Magnesium</b>                       | C0024467 | float   | mmol/L |
| <b>Creatinine Clearance</b>            | C0373595 | float   | mL/min |
| <b>Gamma-glutamyl transpeptidase</b>   | C1883012 | float   | U/L    |
| <b>Urea</b>                            | C0523961 | float   | mmol/L |
|                                        |          |         |        |
| <b>Medication</b>                      |          |         |        |
|                                        |          |         |        |
| <b>Medication</b>                      |          |         |        |
| <b>Current medication list</b>         | C1553892 | text    |        |
| <b>Contraception</b>                   | C0700589 | text    |        |
| <b>Diuretics</b>                       | C0012798 | text    |        |
| <b>Thienopyridine</b>                  | C2936588 | text    |        |
| <b>NSAIDs</b>                          | C0003211 | text    |        |
| <b>Non-statin lipid lowering agent</b> | C0003367 | text    |        |
| <b>Eptifibatide</b>                    | C0253563 | text    |        |
| <b>Calcium channel blocker</b>         | C0006684 | text    |        |

|                                        |                   |          |                                                                                                                                             |
|----------------------------------------|-------------------|----------|---------------------------------------------------------------------------------------------------------------------------------------------|
| <b>Insulin</b>                         | C0021641          | text     |                                                                                                                                             |
| <b>Oral Thrombin inhibitor</b>         | C3536847          | text     |                                                                                                                                             |
| <b>Vitamin-K antagonists</b>           | C2267235          | text     |                                                                                                                                             |
| <b>Iotropic agent</b>                  | C0304509          | text     |                                                                                                                                             |
| <b>Antiarrhythmics</b>                 | C0003195          | text     |                                                                                                                                             |
| <b>Marcumar</b>                        | C0031444          | text     |                                                                                                                                             |
| <b>Catecholamines</b>                  | C0007412          | text     |                                                                                                                                             |
| <b>Tirofiban</b>                       | C0247025          | text     |                                                                                                                                             |
| <b>Abciximab</b>                       | C0288672          | text     |                                                                                                                                             |
| <b>Urokinase</b>                       | C0042071          | text     |                                                                                                                                             |
| <b>Digoxin</b>                         | C0012265          | text     |                                                                                                                                             |
| <b>Streptokinase</b>                   | C0038418          | text     |                                                                                                                                             |
| <b>Ranolazine</b>                      | C0073633          | text     |                                                                                                                                             |
| <b>Proton pump inhibitors</b>          | C0358591          | text     |                                                                                                                                             |
| <b>Ivabradin</b>                       | C0257190          | text     |                                                                                                                                             |
| <b>Nitrates</b>                        | C0017887          | text     |                                                                                                                                             |
|                                        |                   |          |                                                                                                                                             |
| <b>Aspirin</b>                         | C0004057          |          |                                                                                                                                             |
| <b>Aspirin contraindication</b>        | C0729798          | boolean  |                                                                                                                                             |
| <b>Aspirin dosage</b>                  | C0178602 C0004057 | float    | mg                                                                                                                                          |
| <b>Aspirin at discharge</b>            | C3871203 C0004057 | boolean  |                                                                                                                                             |
|                                        |                   |          |                                                                                                                                             |
| <b>Anticoagulation</b>                 | C0003280          |          |                                                                                                                                             |
| <b>Anticoagulation start date</b>      | C0003280 C0808070 | datetime |                                                                                                                                             |
| <b>Anticoagulation dose</b>            | C0178602 C0003280 | float    | mg                                                                                                                                          |
| <b>Anticoagulant</b>                   | C0003280          | text     | IV unfractionated=IV unfractionated Low molecular weight=Low molecular weight Bivalirudin=Bivalirudin Fondaparinux=Fondaparinux Other=Other |
| <b>Oral anticoagulant</b>              | C0354604          | boolean  |                                                                                                                                             |
| <b>Anticoagulation contraindicated</b> | C1531588          | boolean  |                                                                                                                                             |
|                                        |                   |          |                                                                                                                                             |
| <b>Thrombolytics</b>                   | C0040044          |          |                                                                                                                                             |

|                                                |                   |          |  |
|------------------------------------------------|-------------------|----------|--|
| <b>Thrombolytics contraindicated</b>           | C3260558          | boolean  |  |
| <b>Thrombolytics dosage</b>                    | C0040044 C0178602 | float    |  |
|                                                |                   |          |  |
| <b>Clopidogrel</b>                             | C0070166          |          |  |
| <b>Clopidogrel contraindicated</b>             | C1319916          | boolean  |  |
| <b>Clopidogrel dosage</b>                      | C0070166 C0178602 | float    |  |
| <b>Clopidogrel start time</b>                  | C130188 C0070166  | datetime |  |
|                                                |                   |          |  |
| <b>Low molecular weight heparin</b>            | C0019139          |          |  |
| <b>Enoxaparin</b>                              | C0206460          | text     |  |
| <b>LMWH start date</b>                         | C3536766 C1301880 | datetime |  |
| <b>LMWH dose</b>                               | C3536766 C0178602 | float    |  |
|                                                |                   |          |  |
| <b>Glycoprotein 2b/3a inhibitors</b>           | C3640054          |          |  |
| <b>2b/3a blocker dosage</b>                    | C3640054 C0178602 | float    |  |
| <b>2b/3a start time</b>                        | C1301880 C3640054 | datetime |  |
|                                                |                   |          |  |
| <b>Unfractionated heparin</b>                  | C2825026          |          |  |
| <b>Unfractionated heparin contraindication</b> | C2825026 C0522473 | boolean  |  |
| <b>Unfractionated heparin dose</b>             | C2825026 C0178602 | float    |  |
| <b>Unfractionated heparin start time</b>       | C1301880 C2825026 | datetime |  |
|                                                |                   |          |  |
| <b>Beta-Blocker</b>                            | C0001645          |          |  |
| <b>Beta-Blocker contraindication</b>           | C1278474          | boolean  |  |
|                                                |                   |          |  |
| <b>Statins</b>                                 | C0360714          |          |  |
| <b>Statin contraindicated</b>                  | C1277178          | boolean  |  |
| <b>Statin dose</b>                             | C0360714 C0178602 | float    |  |
|                                                |                   |          |  |
| <b>ACE Inhibitors</b>                          | C0003015          |          |  |
| <b>ACE inhibitor contraindicated</b>           | C0003015 C0522473 | boolean  |  |

|                                           |                   |          |  |
|-------------------------------------------|-------------------|----------|--|
| <b>Angiotensin 2 Receptor Antagonists</b> | C0521942          |          |  |
| <b>ARB Contraindication</b>               | C1273465          | boolean  |  |
| <b>Warfarin</b>                           | C0043031          |          |  |
| <b>Warfarin contraindicated</b>           | C0043031 C0522473 | boolean  |  |
| <b>Prasugrel</b>                          | C1620287          |          |  |
| <b>Prasugrel Dose</b>                     | C1620287 C0178602 | float    |  |
| <b>Prasugrel contraindicated</b>          | C1620287 C0522473 | boolean  |  |
| <b>Prasugrel start time</b>               | C1620287 C1301880 | datetime |  |
| <b>Ticagrelor</b>                         | C1999375          |          |  |
| <b>Ticagrelor dosage</b>                  | C1999375 C0178602 | float    |  |
| <b>Ticagrelor contraindication</b>        | C1999375 C0522473 | boolean  |  |
| <b>Ticagrelor start time</b>              | C1999375 C1301880 | datetime |  |
| <b>Bivalirudin</b>                        | C0168273          |          |  |
| <b>Bivalirudin contraindicated</b>        | C0168273 C0522473 | boolean  |  |
| <b>Bivalirudin start time</b>             | C0168273 C1301880 | datetime |  |
| <b>Fondaparinux</b>                       | C1098510          |          |  |
| <b>Contraindication to fondaparinux</b>   | C0700589 C0522473 | boolean  |  |
| <b>Ticlopidine</b>                        | C0040207          |          |  |
| <b>Ticlopidine dose</b>                   | C0040207 C0178602 | float    |  |
| <b>Ticlopidin contraindicated</b>         | C0522473 C0040207 | boolean  |  |
| <b>Dabigatran</b>                         | C2348066          |          |  |
| <b>Dabigatran contraindicated</b>         | C2348066 C0522473 | boolean  |  |

|                                                   |                   |          |                           |
|---------------------------------------------------|-------------------|----------|---------------------------|
| <b>Aldosterone Blocking Agent</b>                 | C0002007          |          |                           |
| <b>Aldosterone blocking agent contraindicated</b> | C0002007 C0522473 | boolean  |                           |
| <b>Aldosterone blocking agent dose</b>            | C0002007 C0178602 | float    |                           |
|                                                   |                   |          |                           |
| <b>Rivaroxaban</b>                                | C1739768          |          |                           |
| <b>Rivaroxaban contraindicated</b>                | C1739768 C0522473 | boolean  |                           |
|                                                   |                   |          |                           |
| <b>Dalteparin</b>                                 | C0206461          |          |                           |
| <b>Dalteparin contraindicated</b>                 | C0206461 C0522473 | boolean  |                           |
|                                                   |                   |          |                           |
| <b>Apixaban</b>                                   | C1831808          |          |                           |
| <b>Apixaban contraindicated</b>                   | C1831808 C0522473 | boolean  |                           |
|                                                   |                   |          |                           |
| <b>Outcome</b>                                    |                   |          |                           |
|                                                   |                   |          |                           |
| <b>Outcome</b>                                    |                   |          |                           |
| <b>Adverse events</b>                             | C0877248          | text     |                           |
| <b>Event prolonged hospitalization</b>            | C0745041          | text     |                           |
|                                                   |                   |          |                           |
| <b>Complications</b>                              | C0009566          |          |                           |
| <b>Vascular complications</b>                     | C1393529          | text     |                           |
| <b>Neurological complications</b>                 | C0235029          | text     |                           |
|                                                   |                   |          |                           |
| <b>Death</b>                                      | C0011065          |          |                           |
| <b>Discharge Status</b>                           | C0586514          | text     | 1=Death 2=Alive 3=Unknown |
| <b>Cause of Death</b>                             | C0007465          | text     |                           |
| <b>Date of death</b>                              | C1148348          | datetime |                           |
| <b>Autopsy performed</b>                          | C0004398          | boolean  |                           |
|                                                   |                   |          |                           |
| <b>Rehospitalization</b>                          | C0600290          |          |                           |



|                                      |                   |          |                                       |
|--------------------------------------|-------------------|----------|---------------------------------------|
| <b>Reason for Rehospitalization</b>  | C1830395          | text     |                                       |
| <b>Date of Rehospitalization</b>     | C1264639 C0600290 | datetime |                                       |
|                                      |                   |          |                                       |
| <b>Rehabilitation</b>                |                   |          |                                       |
| <b>Cardiac rehabilitation</b>        | C0700431          | boolean  |                                       |
| <b>Smoking counseling</b>            | C1273715          | boolean  |                                       |
|                                      |                   |          |                                       |
| <b>Procedures</b>                    |                   |          |                                       |
|                                      |                   |          |                                       |
| <b>Procedures</b>                    | C0087111          |          |                                       |
| <b>Intra-aortic balloon pump</b>     | C0021860          | boolean  |                                       |
| <b>Cardiac pacemaker</b>             | C0030163          | boolean  |                                       |
| <b>Hemodialysis</b>                  | C0019004          | boolean  |                                       |
| <b>Cardiac surgery</b>               | C0018821          | text     |                                       |
| <b>Pulmonary Artery Catheter</b>     | C0190658          | text     |                                       |
| <b>Ventilator</b>                    | C0087153          | text     |                                       |
| <b>Arterial Access Site</b>          | C3272298          | text     | 1=Femoral 2=Brachial 3=Radial 4=Other |
| <b>Cardiopulmonary Resuscitation</b> | C0007203          | boolean  |                                       |
| <b>Contrast medium</b>               | C0009924          | text     |                                       |
| <b>X-ray tomography</b>              | C0040405          | text     |                                       |
| <b>X-ray Exposure time</b>           | C2348485          | time     |                                       |
| <b>Mechanical support</b>            | C0457617          | text     |                                       |
| <b>MRI imaging</b>                   | C0024485          | text     |                                       |
| <b>Holter monitoring</b>             | C0013801          | text     |                                       |
| <b>Pulmonary angiography</b>         | C0677490          | text     |                                       |
| <b>Hemodialysis</b>                  | C0019004          | text     |                                       |
| <b>Drug eluting balloon</b>          | C1322815          | text     |                                       |
| <b>Valve replacement</b>             | C0190173          | text     |                                       |
| <b>Brachytherapy</b>                 | C0006098          | text     |                                       |
| <b>Comfort measures only</b>         | C0150521          | boolean  |                                       |
| <b>Angioplasty</b>                   | C0162577          | text     |                                       |

|                                              |                   |          |  |
|----------------------------------------------|-------------------|----------|--|
| <b>Revascularization</b>                     | C0581603          | text     |  |
| <b>Ventilation/perfusion scan</b>            | C0560738          | text     |  |
| <b>Urgency</b>                               | C2188402          | text     |  |
|                                              |                   |          |  |
| <b>Percutaneous Coronary Intervention</b>    | C1532338          |          |  |
| <b>History of PCI</b>                        | C1320647          | boolean  |  |
| <b>Contraindication for PCI</b>              | C0522473 C1532338 | boolean  |  |
| <b>Date of most recent PCI</b>               | C1532338 C1264639 | datetime |  |
|                                              |                   |          |  |
| <b>Coronary Artery Bypass Graft</b>          | C0010055          |          |  |
| <b>Date of CABG</b>                          | C2164190          | datetime |  |
| <b>History of CABG</b>                       | C1842251          | boolean  |  |
|                                              |                   |          |  |
| <b>Coronary Angiography</b>                  | C0085532          |          |  |
| <b>Date of Coronary angiography</b>          | C0011008 C0085532 | datetime |  |
| <b>Contraindication for angiography</b>      | C0085532 C0522473 | boolean  |  |
|                                              |                   |          |  |
| <b>Electrocardiogram</b>                     | C0013798          |          |  |
| <b>ECG findings</b>                          | C0438154          | text     |  |
| <b>Time of ECG</b>                           | C2826759          | datetime |  |
|                                              |                   |          |  |
| <b>Surgical procedure</b>                    | C0543467          |          |  |
| <b>History of surgery</b>                    | C0744961          | boolean  |  |
| <b>Non-cardiovascular invasive procedure</b> | C1548804          | text     |  |
|                                              |                   |          |  |
| <b>Myocardial stress test</b>                | C1384495          |          |  |
| <b>Date of stress test</b>                   | C1384495 C0011008 | datetime |  |
| <b>Stress echocardiography</b>               | C0920208          | text     |  |
| <b>Non-invasive stress test</b>              | C3272313          | text     |  |
|                                              |                   |          |  |

|                                         |                   |          |                                                                              |
|-----------------------------------------|-------------------|----------|------------------------------------------------------------------------------|
| <b>Echocardiography</b>                 | C0013516          |          |                                                                              |
| <b>Date of Echocardiogram</b>           | C0013516 C0011008 | datetime |                                                                              |
|                                         |                   |          |                                                                              |
| <b>Cardiac stent placement</b>          | C3272316          |          |                                                                              |
| <b>Stent type</b>                       | C0687568 C0332307 | text     | 1=Drug-eluting stent[C1322815] 2=Bare metal stent[C2825200]<br>3=Other stent |
| <b>Number of stents</b>                 | C2024081          | integer  |                                                                              |
| <b>Stent length</b>                     | C0449462          | text     |                                                                              |
|                                         |                   |          |                                                                              |
| <b>Transfusion of blood</b>             | C0005841          |          |                                                                              |
| <b>Date of blood transfusion</b>        | C1879316 C0011008 | datetime |                                                                              |
|                                         |                   |          |                                                                              |
| <b>Intracardial defibrillator (ICD)</b> | C1273352          |          |                                                                              |
| <b>Temporary pacemaker ICD</b>          | C0162589          | boolean  |                                                                              |
| <b>ICD implantation date</b>            | C1273352 C0011008 | date     |                                                                              |
|                                         |                   |          |                                                                              |
| <b>Examinations</b>                     |                   |          |                                                                              |
|                                         |                   |          |                                                                              |
| <b>Examination findings</b>             | C0243095          |          |                                                                              |
| <b>Pericard</b>                         | C0031050          | text     |                                                                              |
| <b>Mitral valve</b>                     | C0577791          | text     |                                                                              |
| <b>Tricupid valve</b>                   | C0577797          | text     |                                                                              |
| <b>Aortic valve</b>                     | C0577789          | text     |                                                                              |
| <b>Right atrium</b>                     | C1269890          | text     |                                                                              |
| <b>Left atrium</b>                      | C1269894          | text     |                                                                              |
| <b>Aorta</b>                            | C3532907          | text     |                                                                              |
| <b>Cardiac auscultation</b>             | C1291017          | text     |                                                                              |
| <b>Right coronary artery</b>            | C0226042          | text     |                                                                              |
| <b>Right ventricle</b>                  | C0577787          | text     |                                                                              |
| <b>Left ventricle</b>                   | C0577786          | text     |                                                                              |
| <b>Left coronary artery</b>             | C0226029          | text     |                                                                              |
| <b>Physical examination</b>             | C0031809          | text     |                                                                              |

|                                           |          |         |       |
|-------------------------------------------|----------|---------|-------|
| <b>Abdominal wall</b>                     | C1269041 | text    |       |
| <b>Lung percussion</b>                    | C1291006 | text    |       |
| <b>Current condition</b>                  | C1148438 | text    |       |
| <b>Weight</b>                             | C0005910 | float   | kg    |
| <b>Heart rate</b>                         | C0018810 | integer | bpm   |
| <b>Pregnancy</b>                          | C0549206 | boolean |       |
| <b>Height</b>                             | C0005890 | integer | cm    |
| <b>Hypertension</b>                       | C0020538 | boolean |       |
| <b>Left ventricular ejection fraction</b> | C0428772 | float   | %     |
| <b>Chest pain</b>                         | C0008031 | boolean |       |
| <b>Dyspnea</b>                            | C0013404 | boolean |       |
| <b>Peripheral arterial disease</b>        | C1704436 | boolean |       |
| <b>Malignant neoplasm</b>                 | C0006826 | boolean |       |
| <b>Symptoms at admission</b>              | C3177142 | text    |       |
| <b>TIMI Score</b>                         | C3272266 | text    |       |
| <b>Hemodynamic instability</b>            | C0948268 | boolean |       |
| <b>Coronary Artery Disease</b>            | C1956346 | boolean |       |
| <b>Cardiovascular risk factors</b>        | C0850624 | text    |       |
| <b>Aneurysm</b>                           | C0002940 | text    |       |
| <b>Arteriovenous malformation</b>         | C0003857 | text    |       |
| <b>Waist circumference</b>                | C0455829 | integer | cm    |
| <b>Ventricular Septal Defect</b>          | C0018818 | boolean |       |
| <b>Edema</b>                              | C0013604 | boolean |       |
| <b>Cardiac Tamponade</b>                  | C0007177 | boolean |       |
| <b>Trauma</b>                             | C1368081 | text    |       |
| <b>Body mass index</b>                    |          | float   | kg/qm |
| <b>Body surface area</b>                  | C0005902 | float   | qm    |
| <b>Cardiac Wall rupture</b>               | C0018813 | boolean |       |
| <b>Mitral regurgitation</b>               | C0026266 | boolean |       |
| <b>Drug dependence</b>                    | C1510472 | text    |       |
| <b>Left ventricular assist device</b>     | C0181598 | boolean |       |
| <b>COPD</b>                               | C0024117 | boolean |       |

|                                              |          |         |      |
|----------------------------------------------|----------|---------|------|
| <b>Asthma</b>                                | C0004096 | boolean |      |
| <b>Pulmonary embolism</b>                    | C0034065 | boolean |      |
| <b>Carotid stenosis</b>                      | C0007282 | boolean |      |
| <b>Body temperature</b>                      | C0005903 | float   | °C   |
| <b>Breathing sound</b>                       | C0035234 | text    |      |
| <b>Aortic dissection</b>                     | C0340643 | boolean |      |
| <b>Rheumatoid arthritis</b>                  | C0003873 | boolean |      |
| <b>Cyanosis</b>                              | C0010520 | boolean |      |
| <b>Left ventricular systolic dysfunction</b> | C1277187 | boolean |      |
| <b>Syncope</b>                               | C0039070 | boolean |      |
| <b>Puls status</b>                           | C1287726 | text    |      |
| <b>Nutritional status</b>                    | C0392209 | text    |      |
| <b>Mental illness</b>                        | C0004936 | boolean |      |
| <b>Hypotension</b>                           | C0020649 | boolean |      |
| <b>Other arterial thrombotic event</b>       | C0151942 | boolean |      |
| <b>EQ-5D-3L Quality of Life</b>              | C2733251 | text    |      |
| <b>Snusning</b>                              | C0040338 | boolean |      |
| <b>Infectivity</b>                           | C0030657 | text    |      |
| <b>Date of examination</b>                   | C2826643 | date    |      |
| <b>Electrophysiology study</b>               | C1446476 | text    |      |
| <b>Physical status</b>                       | C0450990 | text    |      |
|                                              |          |         |      |
| <b>Blood pressure</b>                        | C0005823 |         |      |
| <b>Systolic blood pressure</b>               | C0871470 | integer | mmHg |
| <b>Diastolic blood pressure</b>              | C0428883 | integer | mmHg |
|                                              |          |         |      |
| <b>Myocardial ischemia</b>                   | C0151744 |         |      |
| <b>ECG signs of myocardial ischemia</b>      | C1141959 | boolean |      |
|                                              |          |         |      |
| <b>Reinfarction</b>                          | C0948369 |         |      |

|                                   |                   |          |                                                                          |
|-----------------------------------|-------------------|----------|--------------------------------------------------------------------------|
| <b>Reinfarction date</b>          | C0948369 C0011008 | datetime |                                                                          |
| <b>Coronary stenosis</b>          | C0242231          |          |                                                                          |
| <b>Stenosis percent</b>           | C3897965          | float    | %                                                                        |
| <b>Culprit artery</b>             | C1299364          | text     | LAD=LAD LCx=LCx RCA=RCA LM=LM Graft/Stent=Graft/Stent<br>Unknown=Unknown |
| <b>Number of diseased vessels</b> | C3275120          | integer  |                                                                          |
| <b>Left main stenosis</b>         | C2825221          | boolean  |                                                                          |
| <b>LAD Stenosis</b>               | C2825222          | boolean  |                                                                          |
|                                   |                   |          |                                                                          |
| <b>Diagnosis</b>                  |                   |          |                                                                          |
|                                   |                   |          |                                                                          |
| <b>Stroke/TIA</b>                 | C0038454          |          |                                                                          |
| <b>History of stroke</b>          | C0559159          | boolean  |                                                                          |
| <b>Type of stroke</b>             | C3897486          | text     | 1=Ischemic 2=Hemorrhagic                                                 |
| <b>Date of stroke</b>             | C0038454 C0011008 | datetime |                                                                          |
|                                   |                   |          |                                                                          |
| <b>Heart failure</b>              | C0018801          |          |                                                                          |
|                                   |                   |          |                                                                          |
| <b>Heart failure</b>              | C0018801          |          |                                                                          |
| <b>History of heart failure</b>   | C0455531          | boolean  |                                                                          |
| <b>Date of heart failure</b>      | C0018801 C1264639 | datetime |                                                                          |
| <b>NYHA classification</b>        | C1275491          | text     | 1=I 2=II 3=III 4=IV                                                      |
|                                   |                   |          |                                                                          |
| <b>Diagnosis</b>                  | C0011900          |          |                                                                          |
| <b>Acute Coronary Syndrome</b>    | C0948089          | boolean  |                                                                          |
| <b>Impaired renal function</b>    | C0151746          | boolean  |                                                                          |
| <b>STEMI</b>                      | C1536220          | boolean  |                                                                          |
| <b>Cardiogenic shock</b>          | C0036980          | boolean  |                                                                          |
| <b>NSTEMI</b>                     | C3537184          | boolean  |                                                                          |
| <b>Impaired hepatic function</b>  | C0086565          | boolean  |                                                                          |
| <b>Increased bleeding risk</b>    | C3251812          | boolean  |                                                                          |

|                                       |                   |          |                                                                                                                                                                      |
|---------------------------------------|-------------------|----------|----------------------------------------------------------------------------------------------------------------------------------------------------------------------|
| <b>Diagnosis</b>                      | C0011900          | text     |                                                                                                                                                                      |
| <b>Atrial fibrillation</b>            | C0004238          | text     |                                                                                                                                                                      |
| <b>Working diagnosis on admission</b> | C0332135          | text     |                                                                                                                                                                      |
| <b>Cardiac arrest</b>                 | C0018790          | boolean  |                                                                                                                                                                      |
| <b>Final/discharge diagnosis</b>      | C0332144          | text     |                                                                                                                                                                      |
| <b>Secondary diagnosis</b>            | C0332138          | text     |                                                                                                                                                                      |
| <b>Depression</b>                     | C0011581          | boolean  |                                                                                                                                                                      |
|                                       |                   |          |                                                                                                                                                                      |
| <b>Hemorrhage</b>                     | C0019080          |          |                                                                                                                                                                      |
| <b>Bleeding location</b>              | C0019080 C0450429 | text     | GI=GI Retroperitoneal=Retroperitoneal Intracranial=Intracranial Access Site=Access Site Other=Other GU=GU                                                            |
| <b>History of bleeding</b>            | C3251812          | boolean  |                                                                                                                                                                      |
|                                       |                   |          |                                                                                                                                                                      |
| <b>Angina pectoris</b>                | C0002962          |          |                                                                                                                                                                      |
| <b>CCS classification</b>             | C1879987          | text     | I=I II=II III=III IV=IV                                                                                                                                              |
| <b>History of Angina pectoris</b>     | C0455530          | boolean  |                                                                                                                                                                      |
| <b>Type of Angina pectoris</b>        |                   | text     | 1=Stable[C0340288] 2=Unstable[C0002965]                                                                                                                              |
|                                       |                   |          |                                                                                                                                                                      |
| <b>Diabetes mellitus</b>              | C0011849          |          |                                                                                                                                                                      |
| <b>Diabetes therapy</b>               | C3274787          | text     | Insulin=Insulin Oral=Oral Diet=Diet None=None Other=Other                                                                                                            |
|                                       |                   |          |                                                                                                                                                                      |
| <b>Myocardial infarction</b>          | C0027051          |          |                                                                                                                                                                      |
| <b>Infarction location</b>            | C0027051 C0450429 | text     | Anterior=Anterior Posterior=Posterior Inferior=Inferior Other=Other                                                                                                  |
| <b>History of MI</b>                  | C1275835          | boolean  |                                                                                                                                                                      |
| <b>Date of most recent MI</b>         | C2924287          | datetime |                                                                                                                                                                      |
|                                       |                   |          |                                                                                                                                                                      |
| <b>EKG</b>                            |                   |          |                                                                                                                                                                      |
|                                       |                   |          |                                                                                                                                                                      |
| <b>EKG findings</b>                   | C0438154          |          |                                                                                                                                                                      |
| <b>Cardiac rhythm</b>                 | C0232187          | text     | Sinus rhythm=Sinus rhythm[C0232201] Atrial fibrillation or flutter=Atrial fibrillation or flutter[C0004238 C0004239] Paced=Paced[C2981711] Other rhythm=Other rhythm |

|                                  |          |         |                                                                                                                       |
|----------------------------------|----------|---------|-----------------------------------------------------------------------------------------------------------------------|
| <b>Left bundle branch block</b>  | C0023211 | boolean |                                                                                                                       |
| <b>Ventricular arrhythmia</b>    | C0085612 | boolean |                                                                                                                       |
| <b>Significant Q waves</b>       | C0429090 | boolean |                                                                                                                       |
| <b>AV block</b>                  | C0004245 | boolean |                                                                                                                       |
| <b>QT interval</b>               | C0429028 | text    |                                                                                                                       |
| <b>Ventricular tachycardia</b>   | C0042514 | boolean |                                                                                                                       |
| <b>Ventricular fibrillation</b>  | C0042510 | boolean |                                                                                                                       |
| <b>PQ time</b>                   | C0429024 | integer | ms                                                                                                                    |
| <b>Right branch bundle block</b> | C0085615 | boolean |                                                                                                                       |
| <b>QTc time</b>                  | C0489625 | integer | ms                                                                                                                    |
|                                  |          |         |                                                                                                                       |
| <b>ST elevation</b>              | C0520886 |         |                                                                                                                       |
| <b>Location of ST elevation</b>  |          | text    | Anterior leads=Anterior leads[C3874460] Lateral leads=Lateral leads[C3874459] Inferior leads=Inferior leads[C3874457] |
|                                  |          |         |                                                                                                                       |
| <b>ST depression</b>             | C0520887 |         |                                                                                                                       |
| <b>Location of ST depression</b> |          | text    | Inferior leads=Inferior leads[C3874480] Anterior leads=Anterior leads[C3874467] Lateral leads=Lateral leads[C0743440] |
|                                  |          |         |                                                                                                                       |
| <b>Pathological T wave</b>       | C0438167 |         |                                                                                                                       |
| <b>T inversion</b>               | C0520888 | boolean |                                                                                                                       |
|                                  |          |         |                                                                                                                       |
| <b>ST-segment changes</b>        | C0232326 |         |                                                                                                                       |
| <b>ST deviation</b>              | C1116089 | boolean |                                                                                                                       |
| <b>Nonspecific ST/T Change</b>   | C0920117 | boolean |                                                                                                                       |
|                                  |          |         |                                                                                                                       |
| <b>QRS annotation</b>            | C0429098 |         |                                                                                                                       |
| <b>QRS duration</b>              | C0429025 | integer | ms                                                                                                                    |
